# Supplementary material for: Tuning the electronic, magnetic, and sensing properties of a single atom embedded microporous C3N6 monolayer towards XO2 (X = C, N, S) gases
Source: Royal Society of Chemistry journal article supplement (doi:10.1039/d2nj01956f), 2022-01-01
Supplement: d2nj01956f1.pdf [file d2nj01956f1.pdf]

## Supplementary Information File

### Tuning the Electronic, Magnetic and Sensing Properties of Single Atom Embedded C<sub>3</sub>N<sub>6</sub> Monolayer Towards XO<sub>2</sub> (X=C,N,S) Gases

Swapnil S. Deshpande<sup>a</sup>, Mrinalini D. Deshpande<sup>a,\*</sup>, Rajeev Ahuja<sup>b,c</sup>, Tanveer Hussain<sup>d,e,\*\*</sup>

<sup>a</sup> Department of Physics, H. P. T. Arts and R. Y. K. Science College, Nasik - 422005, Maharashtra, India.

<sup>b</sup> Department of Physics, Indian Institute of Technology, Ropar, Rupnagar 140001, Punjab, India.

<sup>c</sup> Condensed Matter Theory Group, Materials Theory Division, Department of Physics and Astronomy, Uppsala University, Box 516, SE-75120, Uppsala, Sweden.

<sup>d</sup> School of Chemical Engineering, The University of Queensland, St Lucia, Brisbane 4072. Australia.

<sup>e</sup> School of Science and Technology, University of New England, Armidale, New South Wales 2351, Australia.

---

Corresponding author

Email addresses: \* [d\\_mrinal@yahoo.com](mailto:d_mrinal@yahoo.com) (Mrinalini D. Deshpande),

\*\* [tanveer.hussain@une.edu.au](mailto:tanveer.hussain@une.edu.au) (Tanveer Hussain).

---

#### Electronic band structure and Total and projected density of states of C<sub>3</sub>N<sub>6</sub> monolayer :

The electronic band structure, total and projected density of states analysis (TDOS and PDOS) are shown in Figure S1 (a) and (b), respectively. The band gap of C<sub>3</sub>N<sub>6</sub> analyzed by ultra-violet visible spectroscopy is 3.05 eV reported in the recent study.<sup>S1</sup> The ML is observed to be semiconducting with direct band gap of 0.87 eV. As expected, PBE/GGA predictions underestimate the band gap value. It is seen that the both valence band and conduction bands are flat in electronic band structures. Furthermore, spin-up and spin-down TDOS and PDOS of C and N are symmetrical, which indicate that pristine C<sub>3</sub>N<sub>6</sub> ML possess the characteristics of a non-magnetic ground state. In addition, we can also see from PDOS (Figure S1 (b)), that the valence band edge is mainly composed of the strong hybridization of p<sub>x</sub> and p<sub>y</sub> orbitals of C and N atoms, while the conduction band edge mostly consists of the p<sub>z</sub> orbitals of C and N atoms, which is consistent with the earlier study.<sup>S2</sup>

#### References

- (S1) I. Y. Kim, S. Kim, S. Premkumar, J. H. Yang, S. Umaphathy, and A. Vinu, *Small*, (2019) 1903572-1903578.
- (S2) B. Mortazavi, F. Shojaei, M. Shahrokhi, M. Azizi, T. Rabczuk, A. V. Shapeev, X. Zhuang, *Carbon*, 167 (2020) 40-50.

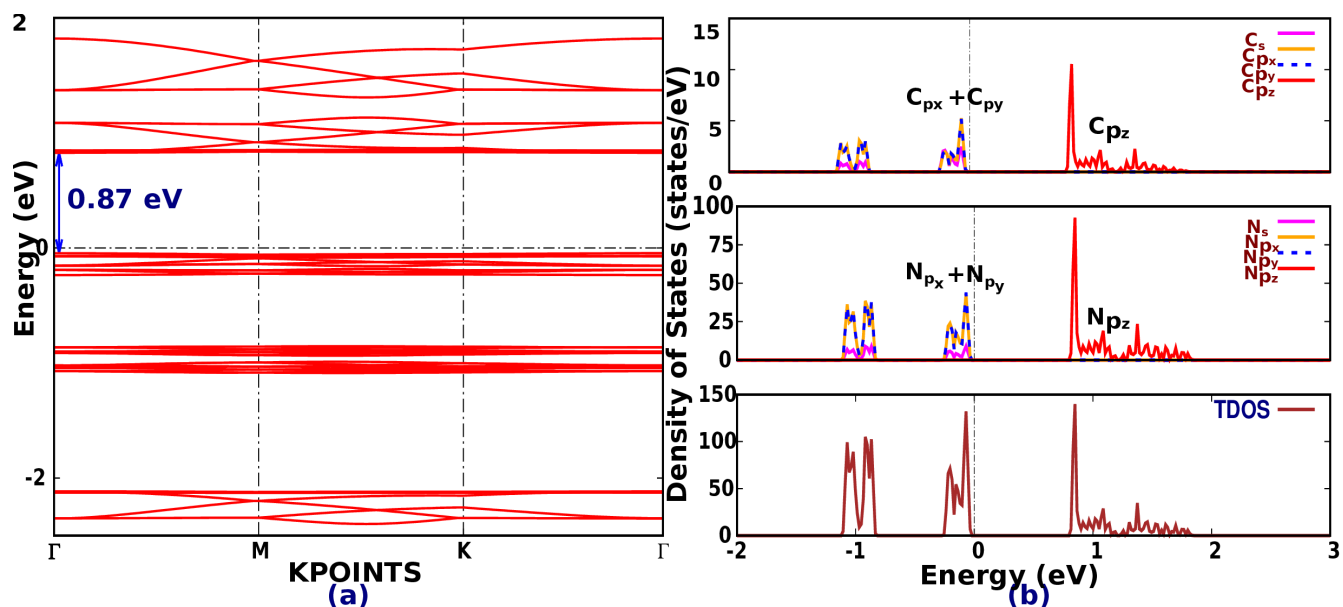

Figure S1. (a) Electronic band structure, and (b) Total and projected density of states of  $C_3N_6$  monolayer, respectively at GGA-PBE level. Fermi energy level is shifted to 0 eV. (A color version of this figure can be viewed online.)

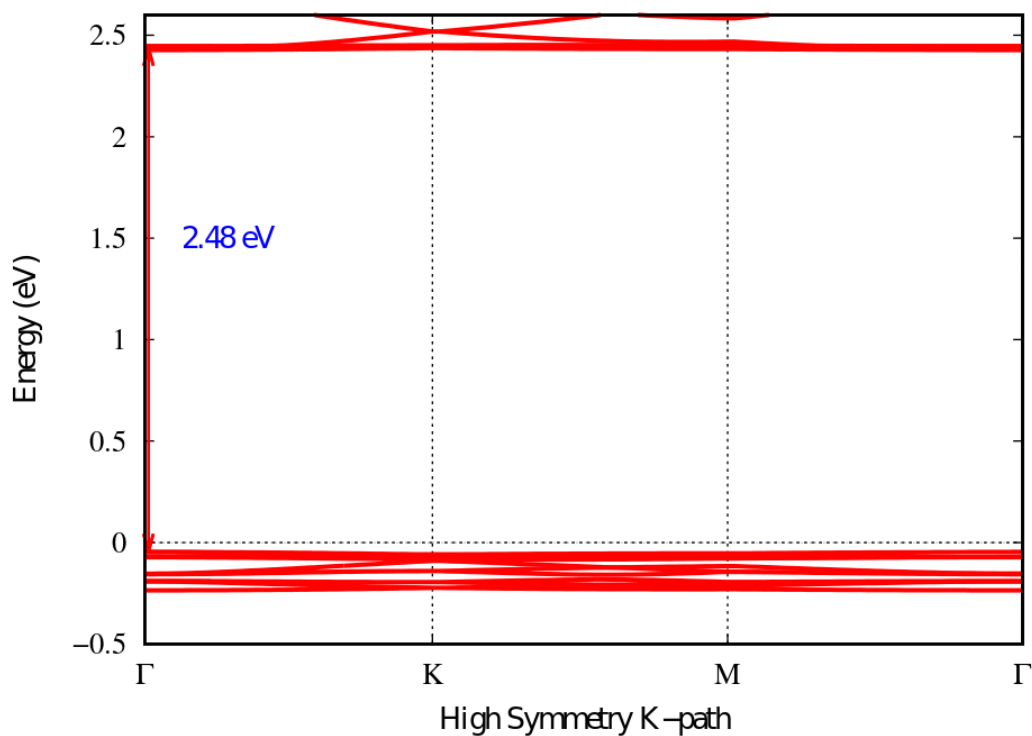

Figure S2: Electronic band structure of pristine  $C_3N_6$  monolayer using HSE06 method.

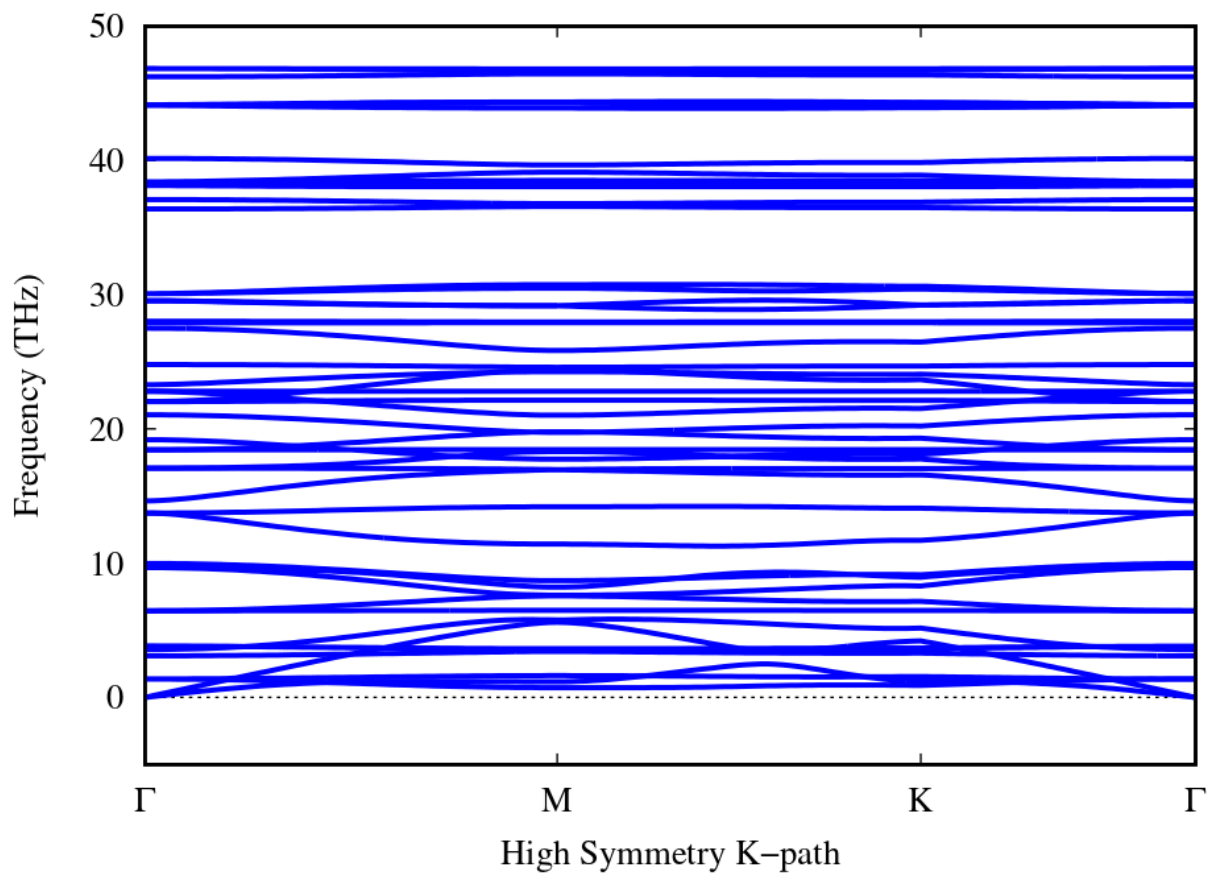

**Figure S3: Phonon dispersion of pristine C<sub>3</sub>N<sub>6</sub> monolayer.**

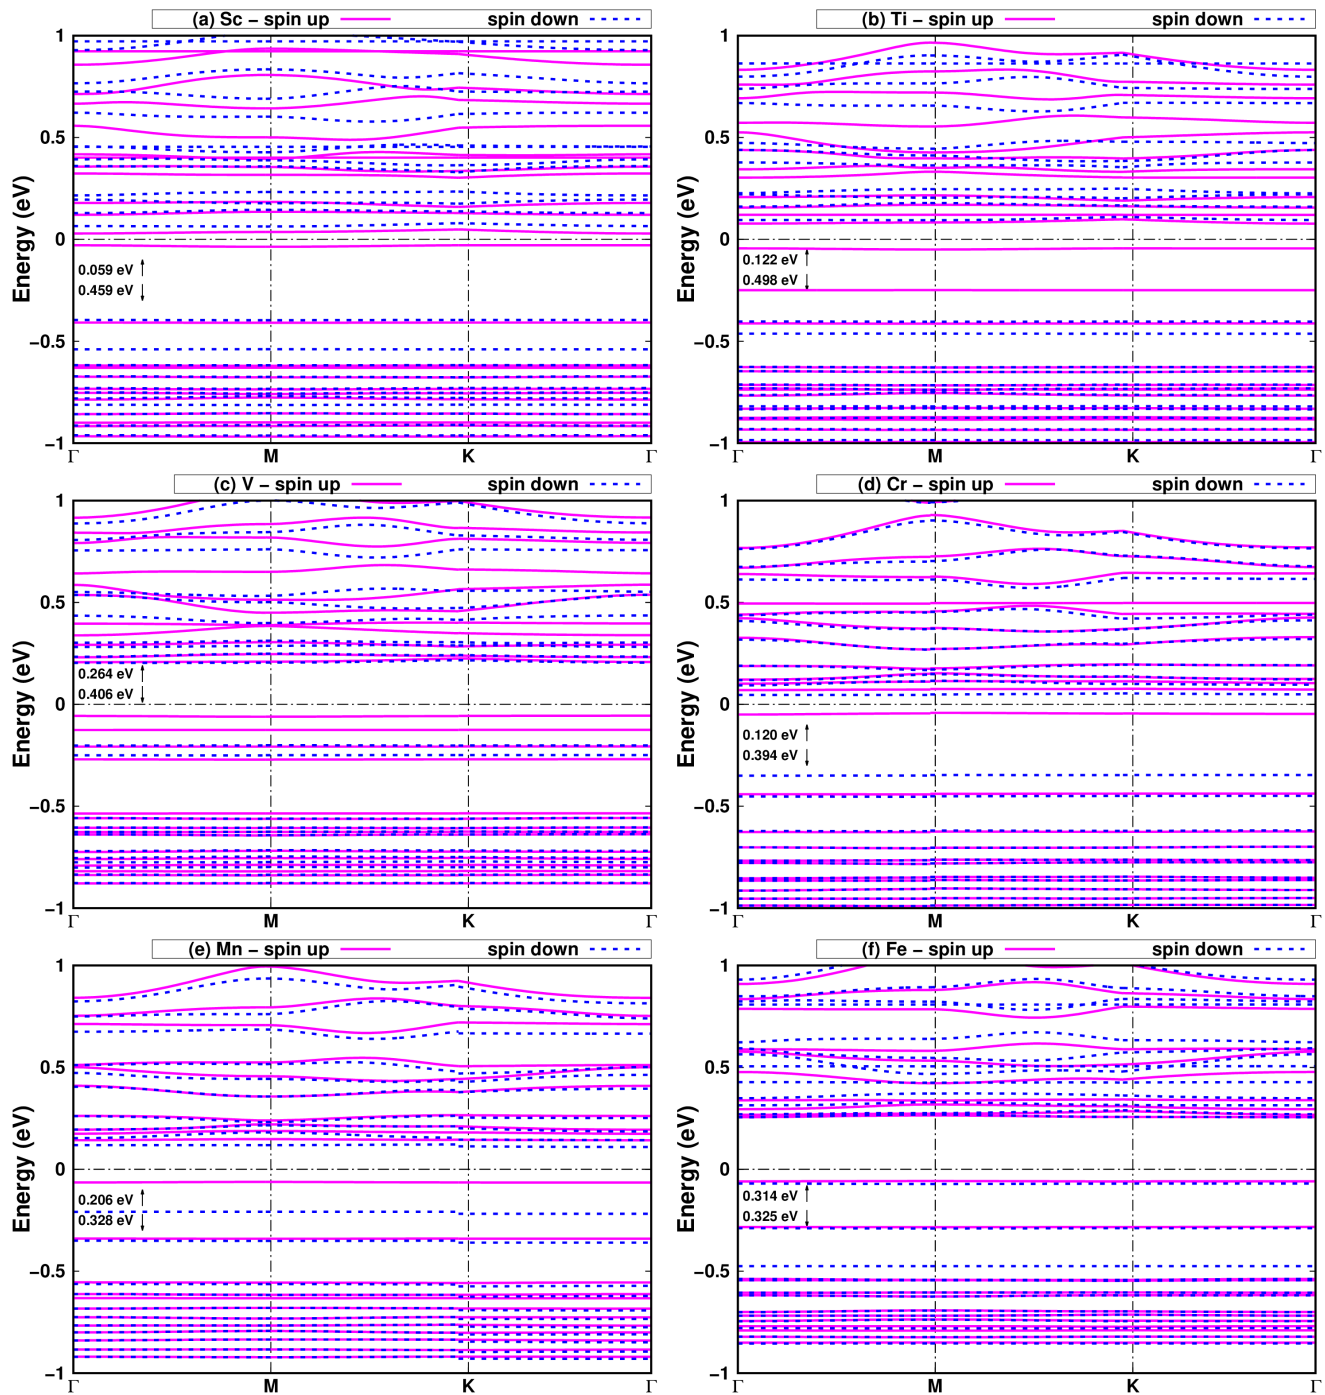

Figure S4. Electronic band structure of (a) Sc, (b) Ti, (c) V, (d) Cr, (e) Mn, and (f) Fe atom embedded  $C_3N_6$  monolayer, respectively. Fermi energy levels shifted to 0 eV. Spin up ( $\uparrow$ ) and spin down ( $\downarrow$ ) states are shown in magenta (continuous line) and blue (dashed line) colors, respectively. (A color version of this figure can be viewed online.)

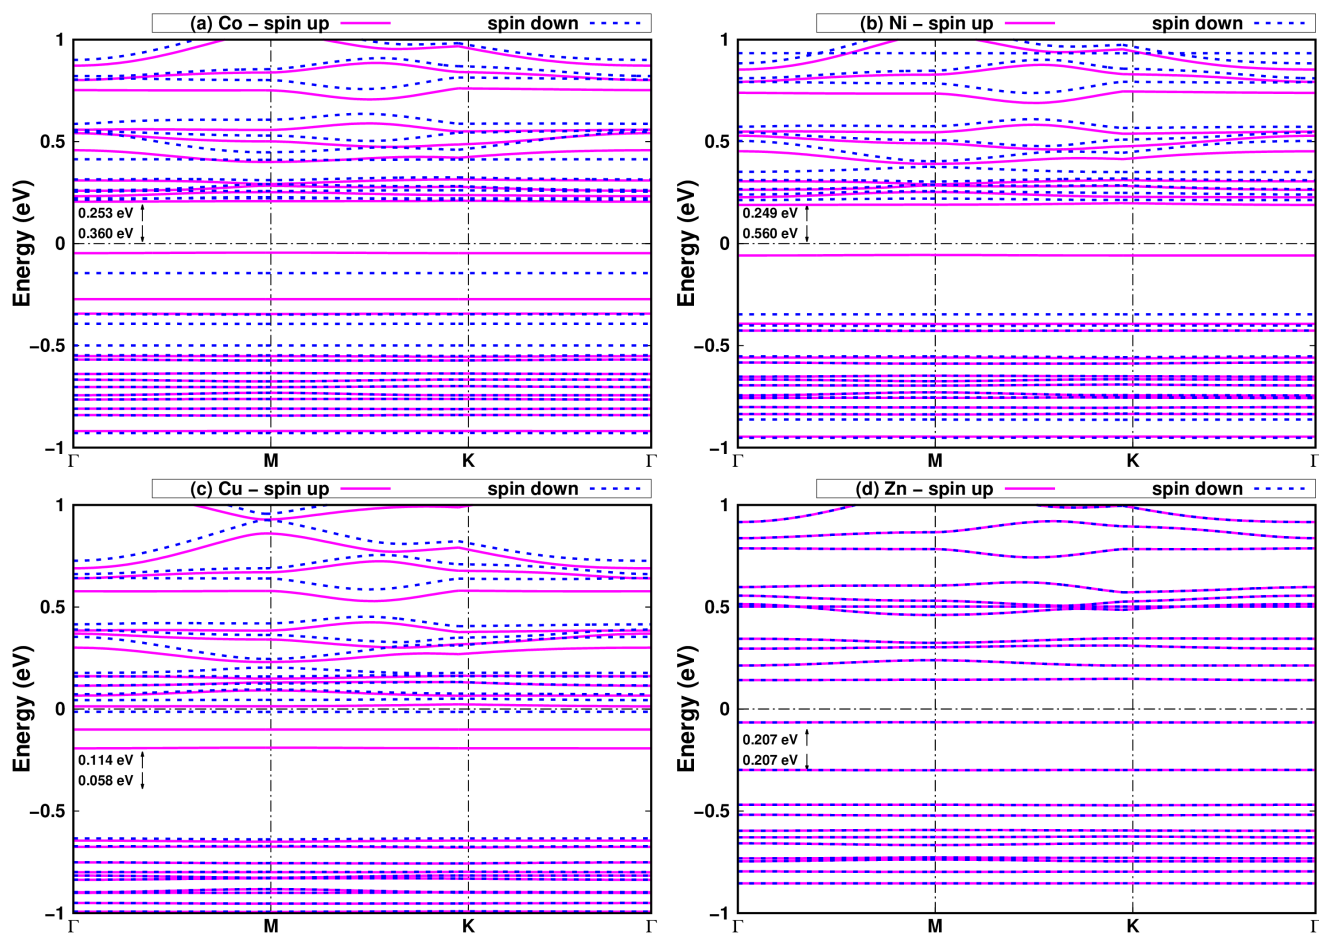

Figure S5. Electronic band structure of (a) Co, (b) Ni, (c) Cu, and (d) Zn atom embedded  $C_3N_6$  monolayer. Fermi energy level is shifted to 0 eV. Spin up ( $\uparrow$ ) and spin down ( $\downarrow$ ) states are shown in magenta (continuous line) and blue (dashed line) colors, respectively. (A color version of this figure can be viewed online.)

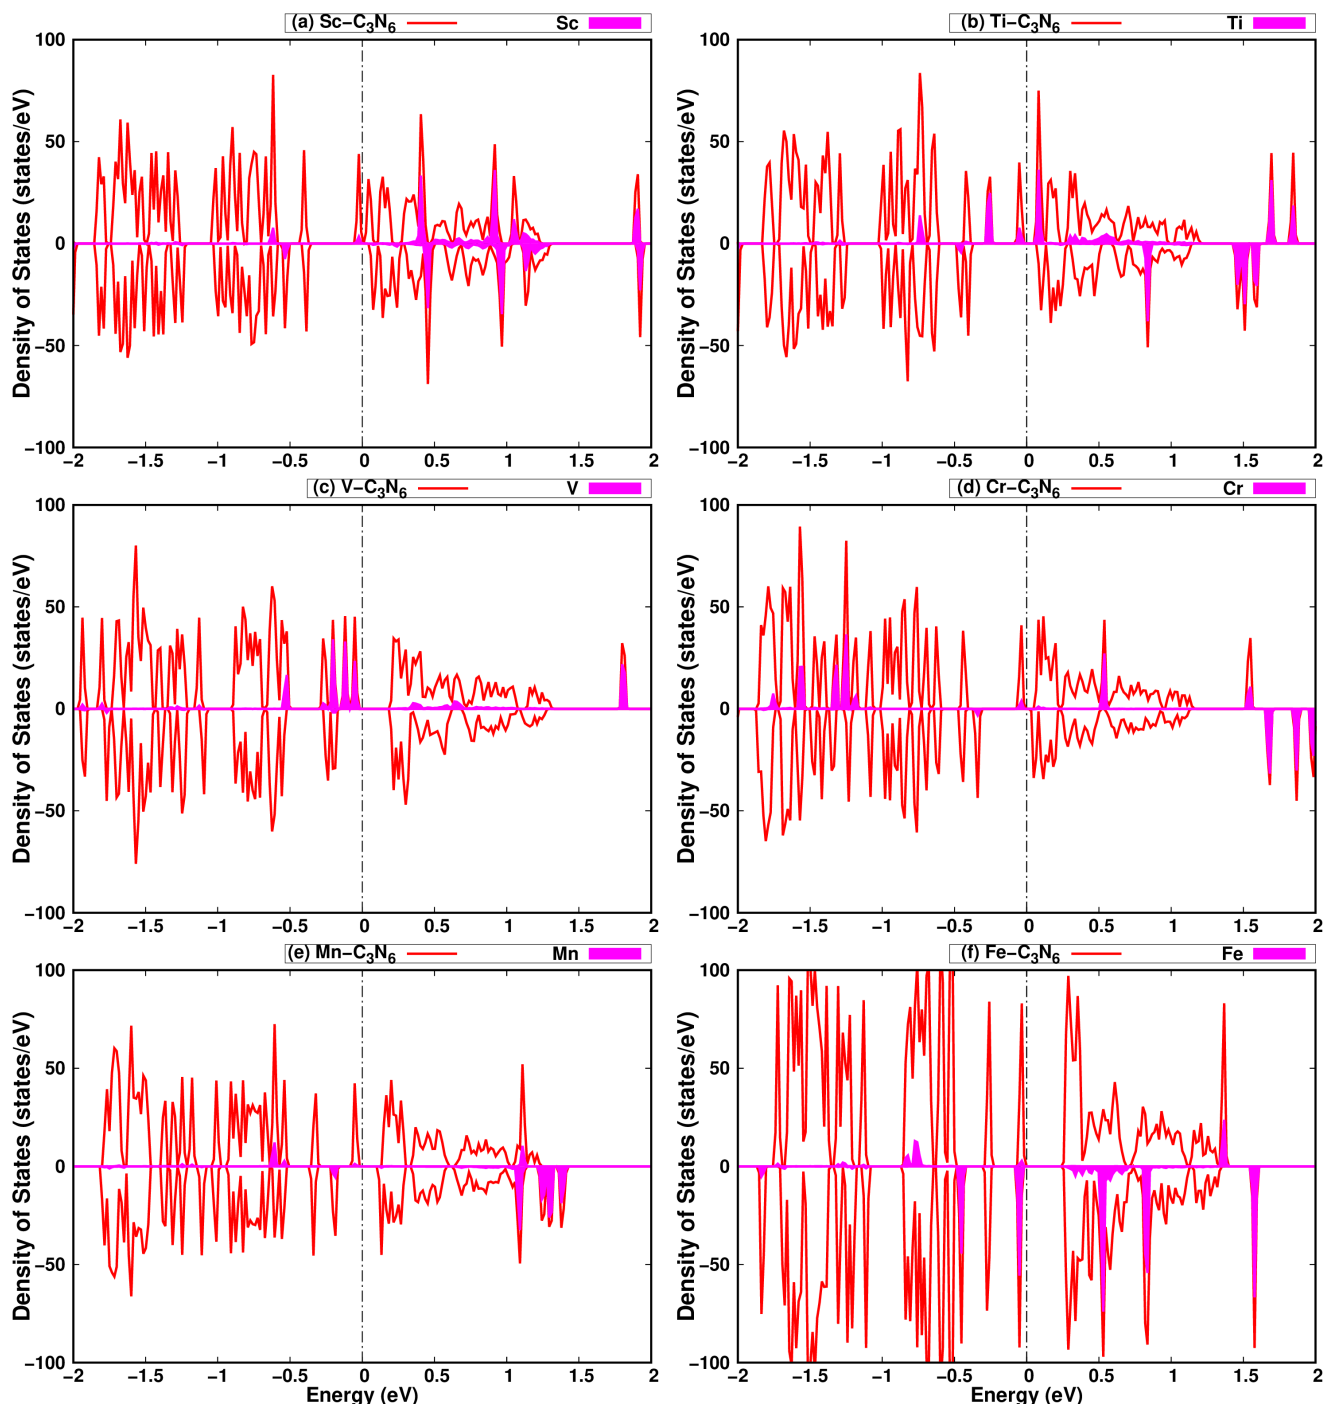

Figure S6. Total Density of States of (a) Sc, (b) Ti, (c) V, (d) Cr, (e) Mn, and (f) Fe atom embedded  $C_3N_6$  monolayer, respectively (Shown in red color). Total contribution of embedded TM atom is shown in magenta color. Fermi energy level is shifted to 0 eV. (A color version of this figure can be viewed online.)

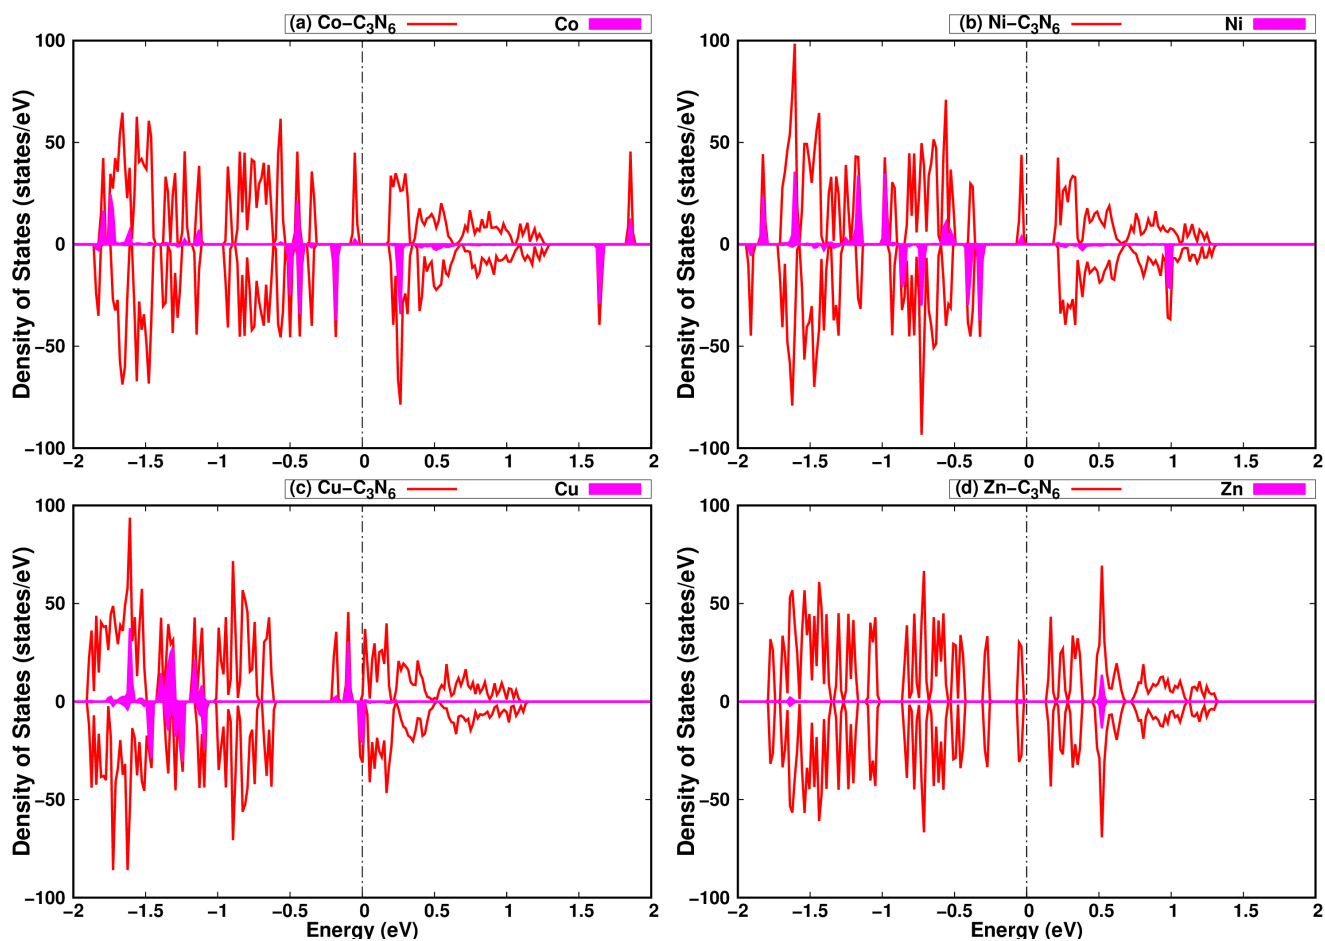

Figure S7. Total Density of States of (a) Co, (b) Ni, (c) Cu, and (d) Zn atom embedded C<sub>3</sub>N<sub>6</sub> monolayer, respectively (Shown in red color). Total contribution of embedded TM atom is shown in magenta color. Fermi energy level is shifted to 0 eV. (A color version of this figure can be viewed online.)

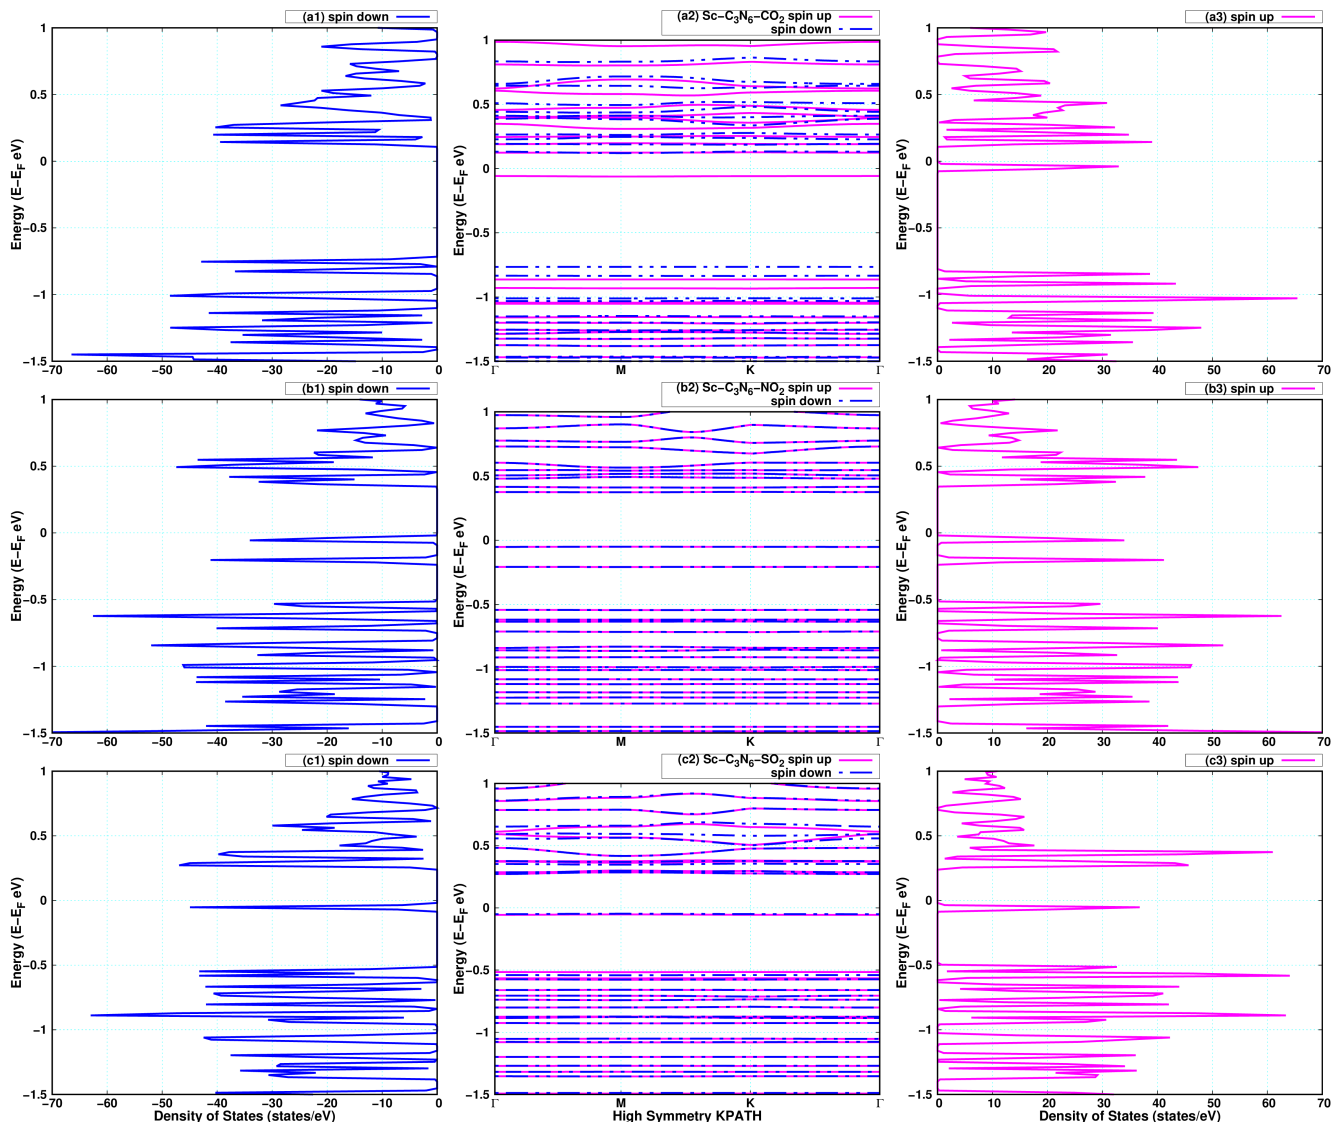

Figure S8. Total density of states and Electronic bandstructure of Sc-C<sub>3</sub>N<sub>6</sub> mono-layer towards (a1-a3) CO<sub>2</sub> (b1-b3) NO<sub>2</sub> (c1-c3) SO<sub>2</sub>, respectively. Fermi energy level is shifted to 0 eV. (A color version of this figure can be viewed online.)



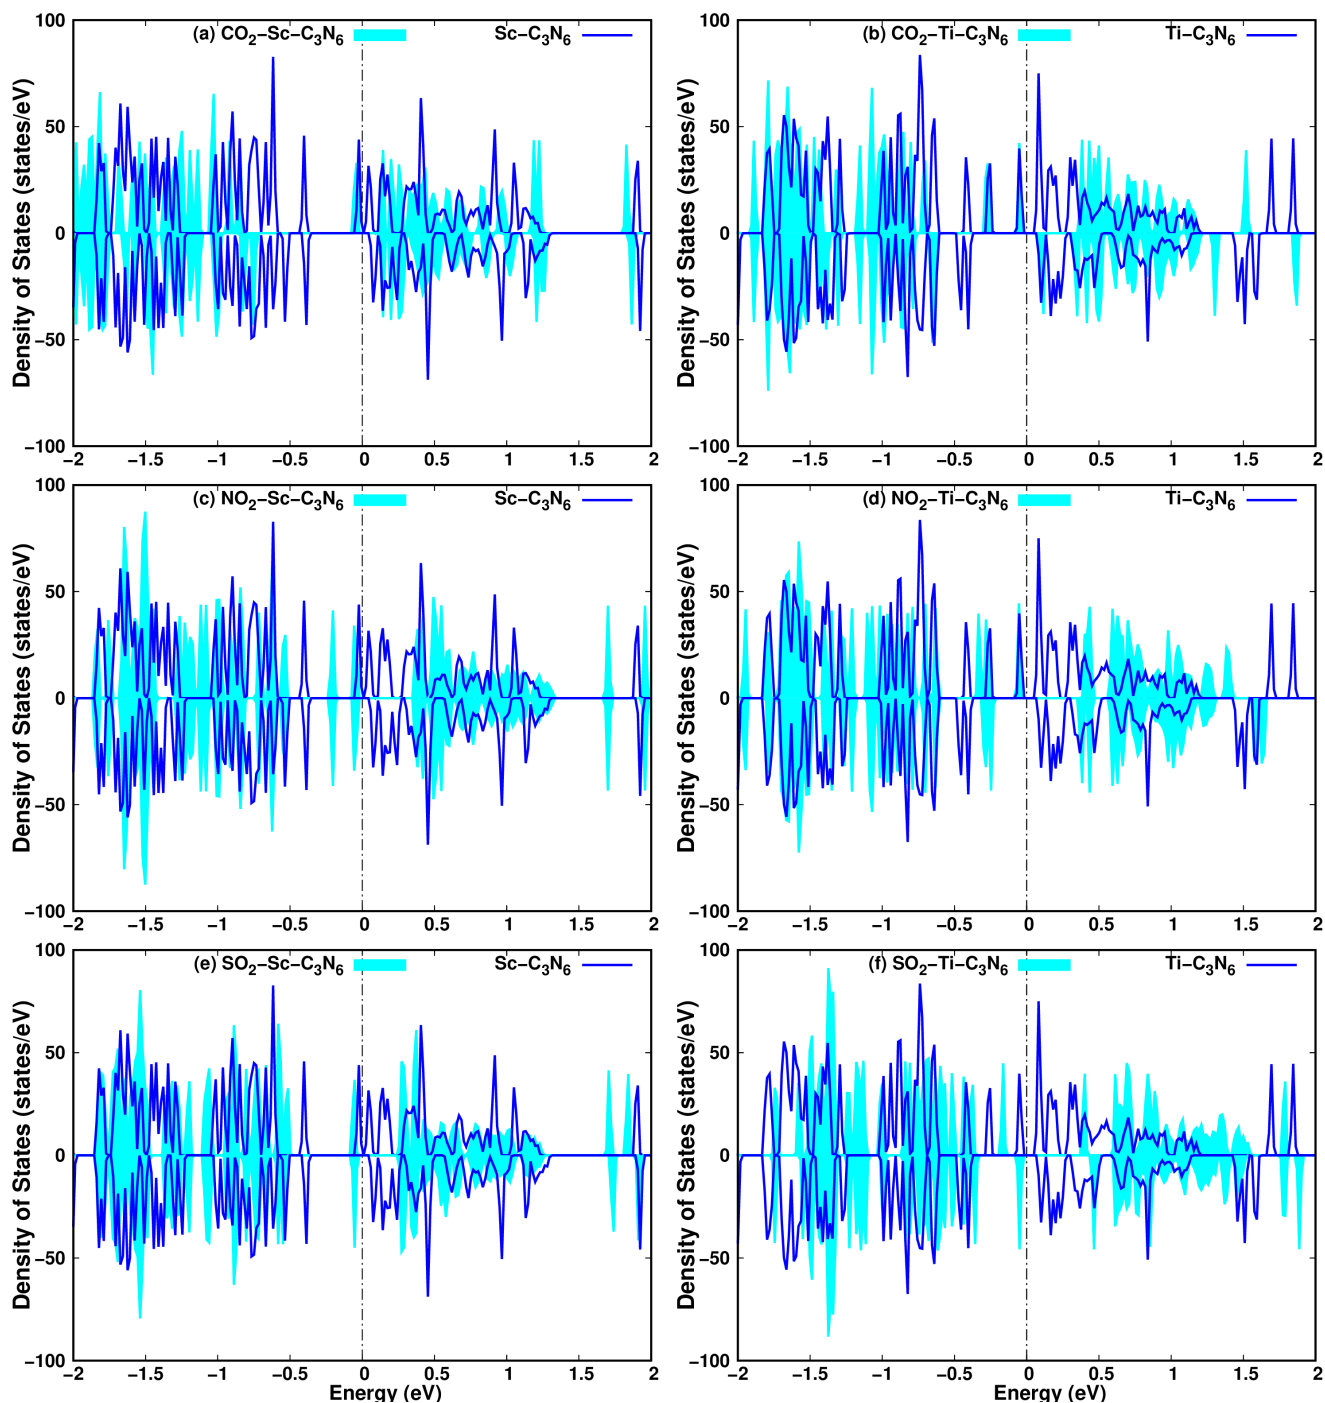

Figure S9. Total density of states of Sc-C<sub>3</sub>N<sub>6</sub> monolayer compared with Sc embedded C<sub>3</sub>N<sub>6</sub> monolayer towards (a) CO<sub>2</sub> (c) NO<sub>2</sub> (e) SO<sub>2</sub>, respectively, and Ti-C<sub>3</sub>N<sub>6</sub> compared with Ti embedded C<sub>3</sub>N<sub>6</sub> monolayer towards (b) CO<sub>2</sub> (d) NO<sub>2</sub> (f) SO<sub>2</sub>, respectively. (A color version of this figure can be viewed online.)
